# Supplementary material for: Metabolic Syndrome and Incident Diabetes
Source: Oxford University Press journal article supplement (doi:10.2337/dc08-0423), 2008-07-01
Supplement: dc080423-sup-supplement_r1.doc [file dc080423-sup-supplement_r1.doc]

| Table 1. Summary of characteristics of prospective studies reporting a measure of association between the metabolic syndrome and incident diabetes | | | | | | | | | | | | | |
| --- | --- | --- | --- | --- | --- | --- | --- | --- | --- | --- | --- | --- | --- |
| Reference | Study | Sample size | Gender | Mean or median age (y) | Follow-up (y) | Metabolic syndrome definition | Prevalence (%) | Diabetes defined | No. of events | HR/  RR/  OR | 95% LL | 95% UL | Adjusted for: |
|  |  |  |  |  |  |  |  |  |  |  |  |  |  |
| Hanson 2002 | Gila River Indian Community, US | 890 | M, W | 20+ | 4.1 | Modified WHO 1999 | 31 | WHO 1985 (OGTT) or diagnosis | 144 | 3.58 | 2.56 | 5.00 | Age, sex |
|  |  |  |  |  |  | NCEP 2001 | 31 |  |  | 2.09 | 1.49 | 2.92 | Idem |
| Laaksonen 2002 | Kuopio Ischemic Heart Disease Risk Factor Study, Finland | 958 | M | 42-60 | 4 | NCEP 2001 | 11.4 | FPG >=6.1 mmol/l or clinical diagnosis with treatment | 51 | ~6-7 | — | — | Age |
|  |  |  |  |  |  | Modified WHO 1998 | 22.0 |  |  | ~9 | — | — | Idem |
| Resnick 2003 | Strong Heart Study, US | 2283 | M, W | 45-74 | 7.6 | NCEP 2001 | 35.0 | Self-reported DM, hypoglycemic agent use, FG >=126 mg/dl | 389 | 1.95 | 1.63 | 2.33 | None |
| Sattar 2003 | West of Scotland Coronary Prevention Study, UK | 5974 | M | 55.1-55.2 | 4.9 | Modified NCEP 2001 | 26.2 | >=2 glucose measurements >=126 mg/dl and >36 mg/dl increase, hypoglycemic agents | 139 | 3.51 | 2.47 | 4.98 | None |
| Lorenzo 2003 | San Antonio Heart Study, US | 1734 | M, W | 25-68 | 7-8 | NCEP 2001 | 18.3 | OGTT: WHO 1999, hypoglycemic agents | 195 | 3.30 | 2.27 | 4.80 | Age, sex, ethnicity, family history, impaired glucose tolerance, insulin |
|  |  |  |  |  |  |  |  |  |  | 5.54 | 4.01 | 7.66 | Age, sex, ethnicity, family history |
|  |  |  |  |  |  | Modified WHO 1999 | 15.7 |  |  | — | — | — | Idem |
| Wang 2004 | Beijing Project, China | 308 | M | 25+ | 5 | Modified NCEP 2001 | 13.0 | WHO 1999: OGTT | 70 | 3.98 | 1.85 | 8.58 | Age, education, occupation, smoking, FH DM, total cholesterol |
|  |  |  |  |  |  | Modified WHO 1999 | 33.1 |  |  | 4.46 | 2.56 | 8.87 | Idem |
|  |  |  |  |  |  | Modified EGIR 1999 | 13.0 |  |  | 3.68 | 1.82 | 7.79 | Idem |
|  |  |  |  |  |  | Modified ACE 2004 | 36.4 |  |  | 3.93 | 2.12 | 7.30 | Idem |
|  |  | 319 | W |  |  | Modified NCEP 2001 | 22.3 |  | 76 | 2.80 | 1.48 | 5.32 | Idem |
|  |  |  |  |  |  | Modified WHO 1999 | 32.3 |  |  | 2.08 | 1.05 | 3.53 | Idem |
|  |  |  |  |  |  | Modified EGIR 1999 | 15.4 |  |  | 1.55 | 1.11 | 3.28 | Idem |
|  |  |  |  |  |  | Modified ACE 2004 | 36.7 |  |  | 2.77 | 1.50 | 5.13 | Idem |
| Stern 2004 | Mexico City Diabetes Study, Mexico | 1353 | M, W | 35-64 | 6.3 | NCEP 2001 | 40.9 | OGTT, hypoglycemic agents | 125 | 2.63 | 1.80 | 3.85 | None |
| Lim 2005 | Outpatient hypertension clinic, UK | 284 | M, W | 40-80 | 4 | Modified NCEP 2001 | 35.2 | ADA 2002: 2 FPG >= 7 mmol/l | 37 | 7.8 | 2.6 | 23.5 | NS |
| Onat 2005 | Turkish Adult Risk Factor Study, Turkey | 960 | M | >=28 | 4.1 | NCEP 2001 | 30.4 | WHO 1998: FPG>=126 mg/dl, 2-h G>=200 mg/dl, self-reported DM | 36 | 1.3 | NS | NS | Age |
|  |  |  |  |  |  |  |  |  |  | 1.56 | NS | NS | Idem |
|  |  | 935 | W |  |  |  | 42.5 |  | 46 | 1.75 | NS | NS | Idem |
|  |  |  |  |  |  |  |  |  |  | 3.59 | 1.72 | 7.48 | Idem |
| Wilson 2005 | Framingham Offspring Study, US | 1549 | M | 22-81 | 8 | NHLBI/AHA 2004 | 22.5 | FPG>=126 mg/dl, hypoglycemic agents | 99 | 6.92 | 4.47 | 10.81 | Age |
|  |  | 1774 | W |  |  |  | 14.9 |  | 79 | 6.90 | 4.35 | 10.94 | Idem |
| Hanley 2005 | Insulin Resistance Atherosclerosis Study, US | 822 | M, W | 40-69 | 5.2 | WHO 1999 | 34.4 | WHO 1999: OGTT | 131 | 3.68 | 2.48 | 5.45 | Age, sex, center, ethnicity |
|  |  |  |  |  |  | NCEP 2001 | 27.5 |  |  | 4.14 | 2.79 | 6.16 | Idem |
|  |  |  |  |  |  | IDF 2005 | 39.5 |  |  | 3.40 | 2.28 | 5.06 | Idem |
| Wannamethee 2005 | British Regional Heart Study, UK | 5128 | M | 40-59 | 20 | Modified NCEP 2001 | 26.0 | Self-reported DM, medical records, death certificates | 299 | 3.57 | 2.83 | 4.50 | Age, social class, smoking, physical activity, alcohol use |
| Meigs 2006 | Framingham Offspring Study, US | 2902 | M,W | 53 | 6.8 | NHLBI/AHA 2004 | 27.7 | FPG >=126 mg/dl or hypoglycemic agents | 141 | 6.98 | 4.58 | 10.6 | Age, sex, FH DM, IGT |
| Lorenzo 2007 | San Antonio Heart Study, US | 1709 | M, W | 25-64 | 7.4 | AHA/NHLBI 2005 | 16.8-30.9 | ADA 2003: OGTT, hypoglycemic agents | 195 | 6.90 | 4.97 | 9.58 | Age, sex, ethnicity, FH DM |
|  |  |  |  |  |  | IDF 2005 | 24.7-40.4 |  |  | 5.76 | 4.11 | 9.07 | Idem |
|  |  |  |  |  |  | Modified WHO 1999 | 12.1-28.3 |  |  | 6.67 | 4.75 | 9.35 | Idem |
| Meigs 2007 | Framingham Offspring Study, US | 2803 | M,W | 26-82 | 6.8 | AHA/NHLBI 2005 | 27.8 | >=7.0 mmol/l or hypoglycemic agents | 135 | 8.6 | 5.7 | 12.9 | Age, sex |
|  |  |  |  |  |  | IDF 2005 | 34.2 |  |  | 10.5 | 6.5 | 16.9 | Idem |
|  |  |  |  |  |  | EGIR 1999 | 19.1 |  |  | 8.1 | 5.6 | 11.7 | Idem |
|  |  |  |  |  |  | AHA/NHLBI 2005 |  |  |  | 3.35 | 2.2 | 5.6 | Age, sex, parental history DM, BMI, 2-h OGTT |
|  |  |  |  |  |  | IDF 2005 |  |  |  | 4.6 | 2.7 | 7.7 | Idem |
|  |  |  |  |  |  | EGIR 1999 |  |  |  | 3.3 | 2.1 | 5.1 | Idem |
| Wang 2007 | Beijing Project, China | 541 | M,W | 25+ | 5 | Modified WHO 1999 |  | WHO 1999: OGTT | 126 | 2.39 | 1.51 | 3.77 | Age, sex, education, occupation, smoking, FH DM, total cholesterol |
|  |  |  |  |  |  | Modified EGIR 1999 |  |  |  | 1.88 | 1.08 | 3.27 | Idem |
|  |  |  |  |  |  | Modified ACE |  |  |  | 2.97 | 1.85 | 4.76 | Idem |
|  |  |  |  |  |  | Modified IDF 2005 |  |  |  | 2.05 | 1.27 | 3.30 | Idem |
|  |  |  |  |  |  | Modified AHA/NHLBI 2005 |  |  |  | 2.33 | 1.47 | 3.70 | Idem |
| Cheung 2007 | Hong Kong Cardiovascular Risk Factor Prevalence Study, China | 1679 | M,W | 25-74 | 6.4 | NCEP 2001 | 7.5 | ADA 2003: OGTT | 120 | 4.2 | 2.7 | 6.5 | Age, sex, smoking, alcohol use, physical activity |
|  |  |  |  |  |  | NHLBI/AHA 2004 | 10 |  |  | 4.5 | 3.0 | 6.8 | Idem |
|  |  |  |  |  |  | AHA/NHLBI 2005 | 14.5 |  |  | 4.1 | 2.8 | 6.0 | Idem |
|  |  |  |  |  |  | IDF 2005 | 11.4 |  |  | 3.5 | 2.3 | 5.2 | Idem |
| Elwood 2007 | Caerphilly Cohort Study, UK | 2211 | M | 45-59 | 20 | Modified WHO 1999 | 16 | Self-reported DM | NS | 4.09 | 2.92 | 5.74 | Age, smoking, social class, prevalent vascular disease |
| Cameron 2007 | Mauritius study, Mauritius | 3198 | M,W | >=25 | 5 | Modified WHO 1999 | 14.6 | WHO 1999: OGTT | 297 | 4.6 | 3.5 | 6.0 | Age, sex |
|  |  |  |  |  |  | NCEP 2001 | 14.1 |  |  | 3.1 | 2.3 | 4.0 | Idem |
|  |  |  |  |  |  | EGIR 1999 | 9.2 |  |  | 3.2 | 2.3 | 4.3 | Idem |
|  |  |  |  |  |  | IDF 2005 | 10.6 |  |  | 3.0 | 2.2 | 4.2 | Idem |
| Mannucci 2007 | Firenze-Bagno A Ripoli Study, Italy | 2921 | M,W | 40-75 | 2.3 | NCEP 2001 | 13.7 | Register, reimbursement for medication use, hospital admissions | 38 | 9.90 | 4.88 | 20.00 | Age, sex |
|  |  |  |  |  |  | AHA/NHLBI 2005 | 19.1 |  |  | 6.20 | 3.07 | 12.50 | Idem |
|  |  |  |  |  |  | IDF 2005 | 25.2 |  |  | 8.00 | 3.58 | 17.86 | Idem |
| Cameron 2008 | AusDiab, Australia | 5842 | M,W | >=25 | 5 | Total |  | WHO 1999: OGTT | 224 |  |  |  |  |
|  |  |  |  |  |  | Modified WHO 1999 | 18.6 |  |  | 7.8 | 5.5 | 11.0 | None |
|  |  |  |  |  |  | NCEP 2004 | 25.1 |  |  | 6.4 | 4.6 | 9.0 | Idem |
|  |  |  |  |  |  | EGIR 1999 | 15.3 |  |  | 7.4 | 5.2 | 10.4 | Idem |
|  |  |  |  |  |  | IDF 2005 | 30.1 |  |  | 5.5 | 3.9 | 7.6 | Idem |
|  |  |  |  |  |  | Men |  |  |  |  |  |  |  |
|  |  |  |  |  |  | Modified WHO 1999 | 23.9 |  |  | 6.6 | 4.4 | 9.9 | Idem |
|  |  |  |  |  |  | NCEP 2004 | 29.9 |  |  | 4.1 | 2.8 | 6.0 | Idem |
|  |  |  |  |  |  | EGIR 1999 | 18.6 |  |  | 5.6 | 3.8 | 8.3 | Idem |
|  |  |  |  |  |  | IDF 2005 | 36.3 |  |  | 4.0 | 2.7 | 6.0 | Idem |
|  |  |  |  |  |  | Women |  |  |  |  |  |  |  |
|  |  |  |  |  |  | Modified WHO 1999 | 14.2 |  |  | 5.9 | 4.0 | 8.8 | Idem |
|  |  |  |  |  |  | NCEP 2004 | 21.2 |  |  | 6.8 | 4.5 | 10.0 | Idem |
|  |  |  |  |  |  | EGIR 1999 | 12.7 |  |  | 4.7 | 3.1 | 7.1 | Idem |
|  |  |  |  |  |  | IDF 2005 | 25.0 |  |  | 5.1 | 3.5 | 7.6 | Idem |
|  |  |  |  |  |  |  |  |  |  |  |  |  |  |
| Hadaegh 2008 | Tehran Lipid and Glucose Study, Iran | 4756 | M,W | >=20 | 3.6 | Modified WHO 1999 | 11.0 | ADA 1997: OGTT | 188 | 11.0 | 7.9 | 15.3 | Age, sex |
|  |  |  |  |  |  | IDF 2005 | 37.0 |  |  | 4.3 | 3.0 | 6.0 | Idem |
|  |  |  |  |  |  | NCEP 2001 | 28.1 |  |  | 3.7 | 2.7 | 5.1 | Idem |
|  |  |  |  |  |  | NHLBI/AHA 2004 | 31.6 |  |  | 4.9 | 3.5 | 6.9 | Idem |
|  |  |  |  |  |  |  |  |  |  |  |  |  |  |
|  |  |  |  |  |  |  |  |  |  |  |  |  |  |
|  |  |  |  |  |  |  |  |  |  |  |  |  |  |
|  |  |  |  |  |  |  |  |  |  |  |  |  |  |
|  |  |  |  |  |  |  |  |  |  |  |  |  |  |
| ADA = American Diabetes Association, AHA = American Heart Association, DM = diabetes, EGIR = European Group for the Study of Insulin Resistance, FG = fasting glucose, FH = family history, FPG = fasting plasma glucose, IDF = International Diabetes Federation, NCEP = National Cholesterol Education Program, NHLBI = National Heart, Lung, and Blood Institute, OGTT = oral glucose tolerance test, WHO = World Health Organization. | | | | | | | | | | | | | |
